# Supplementary material for: Effects of Exercise on Chemotherapy Completion and Hospitalization Rates: The OptiTrain Breast Cancer Trial
Source: PubMed Central journal article supplement — Oncologist. 2019 Aug 7;25(1):23–32. doi: 10.1634/theoncologist.2019-0262 (PMC6964125; doi:10.1634/theoncologist.2019-0262), 2019-08-07
Supplement: ONCO-25-23-s002.pdf [file ONCO-25-23-s002.pdf]

Supplemental Tables for:  
 EFFECTS OF EXERCISE ON CHEMOTHERAPY COMPLETION AND HOSPITALIZATION RATES: THE OPTITRAIN BREAST CANCER TRIAL  
 Sara Mijwel et al.

**Supplemental Table S1.** Participant baseline characteristics among chemotherapy dose completers and non-completers and among hospitalized and non-hospitalized participants.

|                                      | Dose reduction<br>(n=48) | No dose reduction<br>(n=158) | p-value* | Hospitalized<br>(n=14) | Not hospitalized<br>(n=192) | p-value* |
|--------------------------------------|--------------------------|------------------------------|----------|------------------------|-----------------------------|----------|
|                                      | Mean±SD                  | Mean±SD                      |          | Mean±SD                | Mean±SD                     |          |
| Age (yrs)                            | 52±11                    | 53±10                        | 0.564    | 52±9                   | 53±10                       | 0.571    |
| Body mass (kg)                       | 66.7±11.6                | 68.9±11.9                    | 0.250    | 69.6±9.1               | 68.3±12.0                   | 0.696    |
| Body mass index (kg/m <sup>2</sup> ) | 24.5±4.2                 | 25.1±4.3                     | 0.373    | 24.9±3.3               | 25.0±4.4                    | 0.973    |
| SED (min/day)                        | 550.34±117.5             | 536.1±105.3                  | 0.197    | 563.4±108.6            | 539.4±108.4                 | 0.433    |
| MVPA (min/day)                       | 67.8±28.7                | 75.4±33.1                    | 0.173    | 67.7±38.2              | 74.2±32.3                   | 0.468    |
|                                      | %                        | %                            | p-value† | %                      | %                           | p-value† |
| Married or partnered                 | 50                       | 66.7                         | 0.044    | 84.6                   | 61.4                        | 0.137    |
| University completed                 | 70.5                     | 64.9                         | 0.495    | 76.9                   | 65.4                        | 0.549    |
| Postmenopausal women                 | 60.4                     | 58.9                         | 0.848    | 64.3                   | 58.9                        | 0.690    |
| Comorbidities                        | 36.4                     | 30.3                         | 0.447    | 61.5                   | 29.6                        | 0.027    |
| Tumor receptor status:               |                          |                              | 0.418    |                        |                             | 0.952    |

|                                           |      |      |       |      |      |       |
|-------------------------------------------|------|------|-------|------|------|-------|
| Triple negative                           | 20.8 | 12.0 |       | 14.3 | 14.1 |       |
| HER2+, ER+/-                              | 20.8 | 24.6 |       | 14.2 | 24.5 |       |
| HER2-, ER+                                | 58.3 | 62.0 |       | 71.4 | 60.4 |       |
| HER2-, ER-                                | 0.0  | 1.3  |       | 0.0  | 1.0  |       |
| Chemotherapy received at baseline:        |      |      | 0.262 |      |      | 0.040 |
| Taxane/taxane+anthracycline based therapy | 66.7 | 57.6 |       | 85.7 | 57.8 |       |
| Anthracycline based therapy               | 33.3 | 42.4 |       | 14.3 | 42.2 |       |
| G-CSF treatment                           | 89.6 | 74.7 | 0.029 | 92.9 | 77.1 | 0.168 |

SD, standard deviation; SED, sedentary time; MVPA, moderate to vigorous physical activity; G-CSF, granulocyte colony stimulating factor; \*One-way ANOVA, †Exact  $\chi^2$  test/Fisher's exact test; p-value<0.05 highlighted in bold font
